# Supplementary material
Source: MDPI journal article supplement (https://www.mdpi.com/2297-8739/10/5/293)
Supplement: s1 [file s1]

Archive with 3 entries (3 files):
- S1 - Classifiers_more detailed explanation.pdf
- S2 - RawData_Heatmap.xlsx
- S3 - BoxCharts.pdf
