# Supplementary material
Source: MDPI journal article supplement (https://www.mdpi.com/2297-8739/10/5/293)
Supplement: s1 [file s1 › S2 - RawData_Heatmap.xlsx]

## Sheet: Data
	Docosane	Tricosane	Tetracosane	Nonanal	Undecanal	Nonanoic acid	Tetradecanoic acid	Hexadecanoic acid	Squalene	Dodecanal	Dodecanoic acid	Octadecanoic acid	Hexacosane	Decanal	5,9-Undecadien-2-one, 6,10-dimethyl-	Octanoic acid	Pentadecanoic acid	7,9-Di-tert-butyl-1-oxaspiro(4,5)deca-6,9-diene-2,8-dione	Dodecane, 1-chloro	Decanoic acid	2-Propenoic acid, 3-(4-methoxyphenyl)-, 1-octyl ester	Hexanoic acid	cis-9-Hexadecenoic acid	Benzoic acid, tridecyl ester	2-Decanone	Furan, 2-pentyl	Heneicosane	Octanal	Benzoic acid, tetradecyl ester	Phenol, 2,4-bis(1,1-dimethylethyl)-	Undecane	cis-Vacennic acid (11-Octadecenoic acid)	2-Propenoic acid, 3-(4-methoxyphenyl)-, 2-ethylhexyl ester	Eicosane	Benzaldehyd	2-Undecanone	Tridecane	Hexadecane	Tetradecane	Tridecanal	14-Pentadecenoic acid	Heptadecanoic acid	Isopropyl myristate	2-Tridecanone	Ethanol, 2-(dodecyloxy)-	Tetradecane, 1-chloro	Dodecane	Nonacosane	2-Dodecanone
F1-W1	217706	208913	193994	382805	131672	2386007	7844274	19615737	18582608	116968	1520403	2997273	170360	290687	364354	546519	4397273	1931488	576454	0	487396	0	4027990	113349	412293	1729337	262208	0	81298	542274	142976	2326279	0	161082	383395	353499	84823	0	61943	38447	283385	708239	733196	115791	0	376396	73974	45071	125579
F1-W10	209262	208279	179778	469216	230487	2465641	10332261	24070421	12292019	205269	2961992	2972916	154237	340061	506011	649525	6232522	597525	836961	339072	900250	1052093	7482492	239759	526573	1354271	154952	292011	157105	285401	286286	4305083	380835	192609	244253	283250	0	103195	0	63755	646799	1083600	286234	79026	3605851	326905	236165	38357	86267
F1-W11	121137	139573	140642	194299	107056	2076623	2713790	5821002	13829246	171776	802846	1334972	140449	191827	175944	442822	1391394	988022	167302	356030	346787	549295	1716144	143078	290338	621224	109233	103506	97205	272271	181065	1542142	157338	78154	101734	68786	585097	69772	182642	80279	145029	139831	0	31525	1246452	118230	188354	37018	22541
F1-W12	168908	215733	256180	244899	154842	1986298	3199453	10885585	14392120	304366	864049	1995125	266370	271415	216309	448865	1892646	1148572	203275	251662	406189	469302	2449215	118916	117211	817537	146019	182204	77055	324794	128109	2026238	113505	81070	104109	53210	221173	75166	95823	148370	169529	369447	123700	36158	1086536	128163	0	91435	26624
F1-W2	155904	150734	115573	396056	201603	2367638	4256237	14686128	9375962	176188	914005	4635467	115847	257162	277361	565887	2365851	662665	391061	0	158580	255420	1954228	59439	252923	1804946	138231	186019	0	506256	102252	7201668	0	107213	206404	327840	90390	54468	89836	1490421	113200	611141	0	85078	764611	292156	97725	0	75228
F1-W3	592714	492935	463500	1286796	209155	4394913	20348987	36929287	11810938	163000	7290865	3496518	299492	506317	2802413	0	11210401	1307887	4260760	799747	1017606	0	11809728	454664	2158168	6541038	775769	874455	279425	1336453	632961	8747549	571142	966951	2208481	2377852	319892	0	133276	0	1042077	1483863	2230765	959141	16199183	2033356	221544	67407	782398
F1-W4	3834656	5832235	6311601	646767	234586	2684994	10530818	28264573	12542329	221692	2708775	2982432	4530508	397845	640994	752027	7351495	726044	824066	0	363766	129875	9427720	201502	753925	2670742	2546053	423274	134281	768632	254676	5412106	162959	1401781	536486	780157	143659	268742	108587	0	588323	1250989	0	409860	9590499	478945	134115	683090	191489
F1-W5	305573	374660	441801	356251	246509	3023104	6310599	19511254	9643139	280887	1485925	2186733	499339	289201	270746	1159285	3963868	960673	564545	684119	491461	829011	4894896	162794	224358	1129016	276442	163780	105183	565804	433065	2818681	150132	153793	171626	190279	445464	131114	189783	88492	356160	687138	638579	57854	1843636	289478	328999	189465	65674
F1-W6	290705	348689	407703	623099	533570	4448297	10820658	30567099	10563653	332890	2687700	3666046	485380	681099	754851	1287210	7639787	1417088	881545	1461269	681321	1015981	9184879	301465	608400	2238027	328922	445305	207570	746568	327849	8323097	232499	210844	435242	507591	148612	211536	160794	92618	680887	1389458	303155	186462	4497346	566544	176933	83279	198529
F1-W7	273800	265352	262903	224678	88022	3179485	568785	1359536	11041543	243204	225466	431108	275554	190454	262821	643748	272033	753786	0	179370	110794	756361	263869	547787	104741	404668	244366	136575	232065	544624	98416	0	88239	274792	0	0	74398	97638	0	99048	157489	0	1791997	50977	0	0	0	70227	34606
F1-W8	163895	276489	227430	335661	170856	2054410	3134198	8105291	12938806	405380	1219368	1293854	201900	266416	460239	477682	1815251	876393	101878	211302	253273	747462	1449383	83081	160428	344868	143916	325222	53833	321461	128748	1616399	166770	79275	107053	50571	137915	105223	104064	274091	216391	234810	202079	44117	2327375	56332	0	73908	32512
F1-W9	131396	151879	126142	172590	92946	2030086	3119596	8562866	13848184	138750	868044	1209776	120593	141512	158304	484019	1901269	643184	251995	166885	177749	523722	1818259	149509	526570	624356	173620	84476	116600	198565	271874	1137612	80384	266459	106792	56256	835089	66946	248420	0	233377	199263	92155	26427	0	180601	268710	58798	29021
F2-W1	720879	1087990	1519676	265171	71430	1619431	2401846	9151933	17473579	85115	875712	3868874	1776091	177934	198046	639892	1343993	247835	57451	392713	784539	416265	1134044	202187	132054	865296	625497	104503	139790	460388	82540	6632079	303384	327910	110309	94239	52436	47166	36634	22934	73907	268174	1999816	37511	1558785	46404	40496	258372	32793
F2-W10	484593	625720	1139751	306436	96980	2219574	2801357	11247530	13798168	139446	3805875	3337970	977053	193035	332063	612367	1380119	1496111	147333	361203	318725	707886	1277956	122393	347752	726451	402707	105920	89848	299733	262672	1891691	158645	238441	0	77042	0	105860	0	47861	70089	266559	458200	0	2184321	92170	0	177394	35678
F2-W11	378361	547075	1011059	395157	197150	2138896	1870977	7094540	15595593	251645	628503	1808078	786870	337813	253932	788662	1129604	1185644	94768	305080	1526971	770426	1473741	155988	444478	585097	0	205966	121582	252158	278015	1119684	312868	183748	161778	58385	1004428	90620	300625	94989	75328	131066	564005	4816	1823888	63903	292978	177794	29521
F2-W12	1505871	3282061	3751243	244193	132236	1881958	1158238	3920610	14097018	246844	1562842	1058551	3306911	242189	189495	483892	399469	997360	182422	214947	367660	592029	1059708	90424	96151	445491	0	198546	67458	320849	159840	0	124310	486031	99689	54276	0	85241	0	83522	0	0	412623	22256	1908892	103493	0	562834	16584
F2-W2	1890361	2775356	319791	224680	67752	2184800	2173814	7961870	16705364	69115	696193	1815933	3357579	159221	160717	631171	1364296	977134	70644	260148	1111964	446165	823310	305929	188628	442189	885685	290329	204605	472710	72395	2949529	512090	422154	77131	125788	35923	44107	42855	24449	73655	311130	893761	32947	1196868	39788	0	403299	27817
F2-W3	544819	863377	1700618	169004	42867	1838366	508002	1602932	12913318	79962	405346	165289	1573100	123196	365989	479983	177082	631347	84828	203818	779737	302582	924725	179855	68330	260073	363624	73949	126451	470619	80121	2132536	242469	238068	0	43527	45810	60859	54523	37989	0	0	1852028	14222	1909724	67749	69160	221544	0
F2-W4	562929	933970	1671327	152308	53918	2037403	1180102	4076760	9676986	68027	869019	1052726	1957525	103887	144754	591324	316892	719868	72243	203738	308515	409519	1115211	145176	70294	288965	443481	0	122247	568849	81573	1231018	165728	227328	48741	38024	55951	78384	60965	22187	0	0	1333507	17968	0	56749	61552	383561	15273
F2-W5	3283780	5330263	7152797	284004	98441	3290088	1532950	7961067	12712681	113386	1326163	1828145	7520397	0	138074	1090039	655195	1335289	146022	349119	425353	889195	1464569	120791	248047	680326	1749758	347595	77201	722604	367446	1564945	153001	839950	102352	73639	389647	97034	0	48876	0	0	670078	28122	0	142115	239610	1008188	21650
F2-W6	752932	977363	1568954	904300	543374	4693184	7028821	25651561	10199461	340261	5227468	7847753	1820331	434148	640106	1741707	2834901	2114199	558081	797690	1099411	1353902	3617724	214864	775063	1817954	568897	605820	139139	724772	0	6260101	319084	398166	715537	567929	191996	318832	183821	31114	229367	661043	4232883	194725	701582	272352	170710	501017	209684
F2-W7	523474	747504	1325007	272394	140252	1889439	1450054	3897056	11791619	259005	1134684	489509	0	228516	367593	540124	663905	763729	26080	232058	2102593	417327	470850	213326	415618	330090	494509	186879	158841	301165	202169	1490449	401712	294157	114249	101984	444013	116797	192706	114211	0	100807	629182	37048	526444	0	163808	150510	32727
F2-W8	321782	439174	437247	220517	88316	2227662	1268181	3294338	12806388	118153	308113	436332	925498	189303	267175	465316	705461	1534907	0	151346	231287	452112	1066213	140843	551566	322418	281952	96947	101609	392191	260208	1532753	147291	222216	110417	50834	913532	0	235267	49831	79135	124293	590213	24550	350346	0	315762	89914	7777
F2-W9	394322	486070	812087	180371	80504	2179515	778521	1922323	15476317	158843	1420557	493425	0	160310	162620	750117	338288	668837	133525	292017	968395	448295	215517	232198	397454	227001	0	123115	183219	259879	247766	0	238986	195758	94153	50629	1016624	53250	239529	24694	0	0	1320999	21727	710477	55802	234019	134992	12013
F3-W1	138216	208238	261105	128341	58422	1336882	469233	1386902	13521009	152668	160788	203043	252865	113830	161629	315620	201513	264165	33244	114825	945481	197859	210133	266622	56868	208146	98493	83609	128585	386672	32695	33512	291641	63195	36543	33910	29849	40377	35033	49830	47722	9450	2273961	0	0	17279	36027	49482	14364
F3-W10	720318	1202284	1333214	345983	101145	1882805	1147758	3302629	16978911	212104	280482	590807	1115091	318817	359073	355913	683954	581002	33347	221143	438950	591415	655473	632780	0	397688	435097	198369	290711	254452	0	769165	135155	326086	105569	30831	0	78035	0	79901	66788	63415	2038349	23328	1025722	30726	0	221357	17752
F3-W11	883074	843640	798486	1052439	351893	2274691	2660944	6389090	10807876	597895	366809	1164474	584629	901665	947017	493516	1363213	1413525	193119	295965	235224	1000551	2126541	624888	409478	717006	723244	746258	284653	220133	198407	1106551	136120	741693	187708	107183	822449	127631	267927	352632	240896	201527	23642236	87377	809974	0	247211	118393	0
F3-W12	384594	341487	308370	411026	220771	1920450	1399609	4842297	17174402	375008	297367	333392	264842	393741	433291	427145	957534	1136392	41267	162488	122579	587819	1419103	501777	111007	505295	344287	209460	221281	319710	138851	874005	85048	453712	97333	51322	0	68194	91982	212223	0	120529	24960914	34931	962678	37663	0	43825	0
F3-W2	351761	440348	552216	287920	91101	1928951	1949558	7579184	10904072	144068	265654	1032790	491161	223026	326780	393088	1421682	658814	31506	156710	966378	430177	1507008	602057	149299	851389	237445	223637	270843	466825	81033	2779349	188622	160992	83237	101873	54350	71489	59186	117471	66153	217702	5532448	29246	224173	0	71530	90492	25576
F3-W3	193947	232817	316711	177259	57546	1703590	560750	1736907	13352832	112496	164244	202408	305306	159181	241933	395306	260284	614237	22818	136892	389730	373462	307759	511678	117463	470876	140257	138759	231935	481921	0	593026	110895	114626	0	59647	41017	59213	57342	66103	52671	32164	4854701	20671	581778	0	55232	77059	21673
F3-W4	918631	1280109	1525994	343428	119883	2031236	2379122	6804608	11379148	287512	554485	801943	1523606	308756	351229	435340	1453443	912525	45499	191540	546733	495512	1647255	592201	131792	443619	524416	177300	269773	574058	89402	950096	152737	397311	76912	84279	62899	77770	60371	113660	134099	219604	3664480	69995	288939	0	57167	310290	37241
F3-W5	1524115	1552824	1614885	936052	312924	3239367	11577430	36764910	10175317	535842	1784506	7510462	1174640	678207	660797	880275	7948252	1651563	412266	455130	1397667	1256890	8717942	1955605	774238	2653062	1265901	416324	869767	4124483	462842	25433009	497622	1432687	351925	504603	378395	225988	212525	127516	568082	1675418	8474463	132277	2798331	200987	329385	318072	117334
F3-W6	273800	265352	262903	224678	88022	3179485	568785	1359536	11041543	243204	225466	431108	275554	190454	262821	643748	272033	753786	0	179370	110794	756361	263869	547787	104741	404668	244366	136575	232065	544624	98416	0	88239	274792	0	0	74398	97638	0	99048	157489	0	1791997	50977	0	0	0	70227	34606
F3-W8	101222	132105	149402	154869	46252	1059180	57746	170640	13217558	112746	0	0	116673	165126	211990	247583	0	587553	48263	52957	722710	342069	0	152130	333990	0	100380	78072	71795	0	245980	0	294229	88146	56060	0	914911	0	269915	31587	0	0	1870697	14913	0	38185	279888	0	0
F3-W9	338944	343921	281149	193896	56154	1953938	1050103	1109414	11483981	151663	177138	79302	190907	165831	148596	332773	192236	501969	32527	137736	917357	418515	151868	504675	436330	336593	372544	89810	221988	244878	288138	96833	215782	414559	67892	0	1179325	92007	311217	66172	0	0	24873667	23883	0	0	338446	38549	0
F4-W1	105554	126571	114293	206511	118680	1644814	1382231	3603025	6599991	329483	525042	620395	93147	112375	84328	396031	680823	710011	104345	130451	91964	255135	439165	45074	0	309900	87779	112804	24887	408863	53150	1318600	97273	38182	97950	87776	36030	57199	44668	0	46357	67858	107877	35178	2503074	0	41797	48649	34069
F4-W10	240386	173783	161777	225330	78360	1850279	2192302	4803191	0	292678	743610	1019067	127627	0	0	410436	161756	0	55492	152814	0	0	0	0	0	0	401476	83084	0	0	0	85489	0	434576	116693	0	0	0	0	65861	912143	158363	0	0	0	34613	0	0	0
F4-W11	148761	214338	152433	268361	284823	2387060	1064479	2369518	8392161	381693	528745	276980	151031	243184	90246	428237	482887	1000562	38460	175676	108804	544052	1600329	52223	0	162828	144189	144788	33091	266011	167765	340806	84214	83958	61004	0	455456	92505	159698	170561	42571	0	89353	0	4070488	0	0	113367	0
F4-W12	183209	273303	316219	288281	226561	1886683	984832	2626799	9116915	412283	451261	398542	401030	214099	174329	329689	418275	1375246	54742	124345	118887	488759	377795	36286	83632	242598	196741	151855	26848	310214	138483	234192	79176	72859	62371	0	0	90558	0	174750	0	0	154886	0	1827636	0	0	159586	0
F4-W2	93111	105551	94658	158044	56876	1755606	557857	2339967	9434143	124082	254687	474766	89969	68394	47721	343710	330245	906037	48599	117518	60673	286107	728475	33753	89191	0	67362	80039	19783	409958	89993	0	61158	39632	56760	61997	40479	47015	533535	91413	0	38301	52013	24821	1496343	0	57221	72841	18276
F4-W3	105449	192271	125654	217108	240116	1956579	2590861	6283178	13329336	201606	1133307	628382	136281	139633	183319	491291	1436963	798200	148053	188673	101826	389356	2014914	31970	145928	0	84656	199842	18509	442803	87848	1876994	103941	47793	92592	144059	48853	46851	57723	102369	139273	149191	0	40231	4769768	82101	59356	58739	42165
F4-W4	269741	343843	273864	342499	223480	2338717	4438771	11270606	13386740	370822	1216286	1258329	332385	285325	216631	605243	2556085	813632	131936	339721	221546	707570	2195762	83097	225428	593836	201685	208760	43610	672421	137483	2497988	214104	0	142326	150013	654227	90081	71955	271439	265559	375408	338292	67656	5412518	49064	71809	101602	60796
F4-W6	510221	655470	577320	817233	367841	4131674	10508721	30467230	10202160	368308	1998774	4646308	364472	488627	744170	845586	6084657	1251544	190382	1026178	576210	1189891	6548769	199451	493961	2246547	0	516725	134781	623532	379133	5636294	431771	295700	414324	411500	155995	245675	178844	80083	556578	1017151	287265	99444	4470847	73547	143927	159086	146208
F4-W7	72214	83378	82301	292112	270753	1783918	818676	2392046	6773736	287343	380504	615394	86223	143315	101220	368776	565485	778291	57056	134197	56346	583146	246026	41741	347987	317942	60158	186132	26106	0	203623	1700066	48862	0	124876	60000	496279	0	168619	121628	41928	69732	0	39512	536545	33360	174920	63731	40445
F4-W8	47162	68654	40296	199201	224385	1937409	278037	532107	3701284	219819	148052	174426	59136	125703	61806	373711	278650	930264	55289	117254	35068	408132	0	0	501431	128754	35862	106676	0	337601	216182	0	27007	0	108026	0	641382	0	221160	95181	0	0	30682	26383	825302	30792	185513	0	17826
F4-W9	409414	759960	795078	85899	39552	1509911	243445	564640	4739560	107409	212366	68515	829093	86029	0	234262	0	381412	30377	74517	1692463	377262	0	37325	235259	114979	248895	48087	21176	194493	154764	0	117543	104834	0	0	722957	66516	163841	20554	0	0	189176	0	199772	0	178229	227025	0
M1-W1	224407	262295	246398	1139648	307656	3049596	26412476	43195680	12389882	301756	8438473	3289051	139815	1057748	2206800	0	14809990	341342	767322	706879	1452400	0	22137098	96747	1225342	3339406	216601	810468	56490	849911	379135	8422540	0	311832	1132457	1630935	182625	173689	114017	0	1940147	1452316	0	547999	6087245	180133	132897	0	309624
M1-W10	138111	143216	129841	259236	92258	2202893	8205070	17268707	13445361	99634	2484165	1298499	73922	310418	522884	486893	4327340	728217	380640	285795	0	703624	7397499	0	312104	330574	106922	144728	0	305506	0	3026257	0	72978	129866	153599	0	85030	0	0	557666	643837	256622	0	5019434	143323	0	0	41267
M1-W11	193877	225533	230889	306400	131220	2150879	9852151	27203972	12623009	89847	2292293	2597577	158399	295777	565279	509021	6878941	656855	267173	280083	131396	95015	11432553	55449	477087	1239325	177852	0	39613	273103	204979	6503491	99209	0	273724	314187	573083	96781	176146	0	825937	991554	175083	69079	4085576	146390	191724	0	85906
M1-W12	222629	261864	394169	376436	201638	1227449	8501530	22591468	12600138	215402	1879862	2072714	438497	389071	590337	458223	5129489	617850	501533	258368	92570	803667	8233015	67394	261008	1250641	176022	212416	35589	279515	263933	4844652	68429	126768	221837	243509	210078	87987	107460	35545	628075	781144	179186	67089	5128723	304396	113481	133613	66128
M1-W2	602532	937372	1159711	411947	160071	2222550	14279604	38343506	12389568	163901	2710985	3987831	781433	427772	616914	536698	8678270	0	328772	564016	1604873	568314	18402514	1569488	469210	1024334	336678	0	1104194	0	0	10475007	0	0	93162	487380	247775	114642	120106	0	1228596	1577215	202919	0	5064515	204203	91846	103108	94160
M1-W3	249676	277344	280056	763613	230373	2493140	19131008	51275430	11473844	203600	3088700	4300570	197097	721658	1563924	716927	12086800	632794	310463	457795	2217046	449464	18573127	112795	825489	2409636	234307	530945	67201	605107	207866	10055669	629345	0	555614	919072	126498	161558	95574	55788	1677837	2227698	388011	233335	5266029	203420	132919	0	234159
M1-W4	693535	1006632	1128274	845734	252362	3078661	20952143	44302302	13027692	0	5265948	3948261	728934	705085	1431405	996641	13199267	518590	797559	512971	1426531	595755	20715099	177932	1007368	2492800	420538	482798	102076	832209	403696	10816089	388381	403157	672604	1264428	184267	170173	129605	0	1738083	1882575	441475	354955	8761309	370372	132034	94299	286770
M1-W5	566564	713668	699110	1348532	299083	5063760	28203502	47513867	10326237	113632	5768821	6237472	500649	720395	1992657	1222463	18249522	1446318	980270	915943	513453	2320640	21585841	196357	1438872	5507950	510995	659554	109315	1007381	913974	12990235	197124	0	15111819	1901420	673384	0	304844	0	1879336	2822904	686284	415210	9865477	589912	0	0	470105
M1-W6	308222	350561	409317	848009	291734	2824451	17834320	46293618	10072390	235736	5001644	4144758	276028	623482	1211908	1172068	11202719	1081794	906535	555072	340946	988001	18189533	204407	723927	907202	255849	0	123879	628088	329251	9714628	192608	0	503051	890112	170116	207543	125198	0	1413883	1997948	321023	180351	0	472044	157101	0	206712
M1-W7	121191	140462	149577	309314	167628	2042653	4080970	13122603	11904219	135492	1096116	1363323	143191	296626	322541	576912	2520905	1216458	143689	205811	0	721495	3157894	0	535393	345303	123463	162761	0	360509	337047	1941044	0	84891	160134	113579	825138	99753	228068	13809	188025	539778	0	47349	556664	59263	242238	0	40726
M1-W8	135913	167731	141697	292738	75553	2483922	7388903	26161748	12489936	64388	1234663	2775055	111829	266852	44526	610284	5009348	791367	131593	387379	48281	853141	8052430	59505	618684	708710	124892	184306	39784	346206	198947	5130354	43916	0	186101	198615	839655	91880	255967	0	473317	953858	49714	39361	585554	85032	266490	0	46459
M1-W9	171519	199658	191870	221119	67600	1947614	8411521	17845373	12969968	46334	2386530	1311641	165440	219238	339028	493434	4549517	806112	613269	217825	150664	600809	7947124	69688	481448	253263	191056	109940	37926	285631	261353	3443713	73173	128817	143913	232737	761859	69225	208547	0	615545	527645	0	48733	3374114	262783	228055	0	47237
M2-W1	117331	122085	119659	149626	84523	1685348	1639642	4242889	8070393	130909	480978	806032	70060	109109	94994	418407	738240	366392	129099	143793	63362	264499	969188	25450	101135	195830	83319	90267	19751	393204	58032	572832	62019	44493	50956	60740	34131	0	42266	18072	84459	92828	0	0	639482	64419	42205	49331	18559
M2-W10	127681	169611	164046	247324	92033	2264027	2674016	5158657	12596600	151562	535516	439391	110663	297165	347167	406090	1319231	1075169	77420	209876	67370	498018	2679128	42098	0	348543	104882	0	24490	295716	0	1232850	65308	59492	0	0	0	43174	0	40280	206016	128246	0	0	1313666	42556	0	0	0
M2-W11	146791	183330	197794	298572	146144	2418137	5147567	11412490	14669722	166691	1206832	1132278	162160	287492	223399	548936	2606867	1088422	227330	246999	113300	696057	4546043	64007	221499	334527	130114	125346	37349	335222	169445	2198048	96070	94600	94881	65857	0	79313	149565	68300	368998	318661	57727	0	3297129	107242	164079	48159	0
M2-W12	201368	251119	289010	336796	246109	1837270	2874850	6963131	15343415	490233	925976	623262	193975	359082	334764	393679	1546847	1265830	250237	243427	108981	364182	3752355	79551	161878	499146	155517	251553	47075	325486	203707	1887912	119385	110774	98795	86543	256061	76058	112431	184375	241882	169315	830737	0	1549627	144564	122659	0	0
M2-W2	258849	318714	322731	305142	171250	1865972	3799123	10167719	9026349	197802	573585	1169032	221776	301906	213273	427018	2189560	528601	114040	270497	96228	497031	4185524	46126	206905	0	156829	223735	38585	405492	67223	2585794	111248	65439	0	195553	56628	59335	61672	63342	281376	382503	0	40109	1596536	87631	59622	140815	38979
M2-W3	113140	145082	133504	101146	45632	850980	1130010	3267777	12455772	96427	239451	572730	142092	95666	104785	161357	616091	403095	46350	90985	72748	146370	1134059	32981	65261	185194	66160	52802	0	0	0	548041	68965	41526	0	38108	0	0	0	25207	75495	81427	203863	0	0	0	0	56902	0
M2-W4	287635	410439	384918	234538	150644	2228979	6276604	16557243	11810858	166466	1120272	1805199	277554	291604	238872	551136	4047959	753616	236928	225023	152246	612412	6558981	66281	186543	529721	0	118208	42098	688624	69118	3743616	134664	0	96123	190641	49353	106363	61973	54945	548180	457354	369980	51153	0	120480	52457	64306	40928
M2-W5	259342	335245	380352	343632	178387	3861486	3533549	9434267	11093143	338410	953078	837084	323518	294947	226577	858481	1776884	1103681	313380	308200	181895	1021248	3077171	99613	360197	706380	125184	214590	57568	729153	313628	1603563	166514	91343	159480	137665	416509	113122	185903	86644	258549	203971	753755	0	699105	186300	310606	117222	47531
M2-W6	223689	319352	341031	391468	208856	3763492	6026183	15197276	10201042	367449	1375441	1450540	225902	358566	359442	750412	3679125	1266821	174796	219984	135533	1008789	4951959	96904	231598	602635	0	256237	47815	559874	208609	2811128	137681	107388	0	152332	110753	165021	134254	137235	450283	383752	163048	43676	2906512	105945	130361	0	51485
M2-W7	64767	80775	78665	215077	105718	2040941	3180890	6071962	13506689	177488	1047383	587180	71372	201672	211885	334962	1299717	698962	65336	159238	251749	663717	1317353	48781	347414	436089	48182	128539	29381	0	285665	1444790	53574	46099	92395	95983	846992	0	272165	82658	93076	138190	0	45138	0	42911	294436	31612	0
M2-W8	184730	204947	232727	476930	416714	2485994	6476024	13651442	13121222	453002	1678160	1055616	155141	473337	628339	598178	3263637	1035901	209053	282297	326069	896316	5227709	111774	496989	654841	170780	242732	61680	345440	219736	4862306	134256	80373	152668	141563	526918	99691	165426	175978	594251	412319	89624	82461	1853381	71017	190949	50339	0
M2-W9	169825	202471	216935	183530	83333	2120622	1211144	2901939	17729425	174645	406287	304755	161841	217986	153810	456955	734084	748283	117765	168787	317158	493896	919800	45020	433508	323259	146718	71999	26477	286502	266109	846739	103412	104521	79811	35566	1079153	61720	263990	46936	114669	63112	100088	24131	2581054	44280	278801	77287	0
[truncated: 263 more columns]
